# Supplementary material
Source: MDPI journal article supplement (https://www.mdpi.com/2077-0472/11/2/147)
Supplement: s1 [file s1]

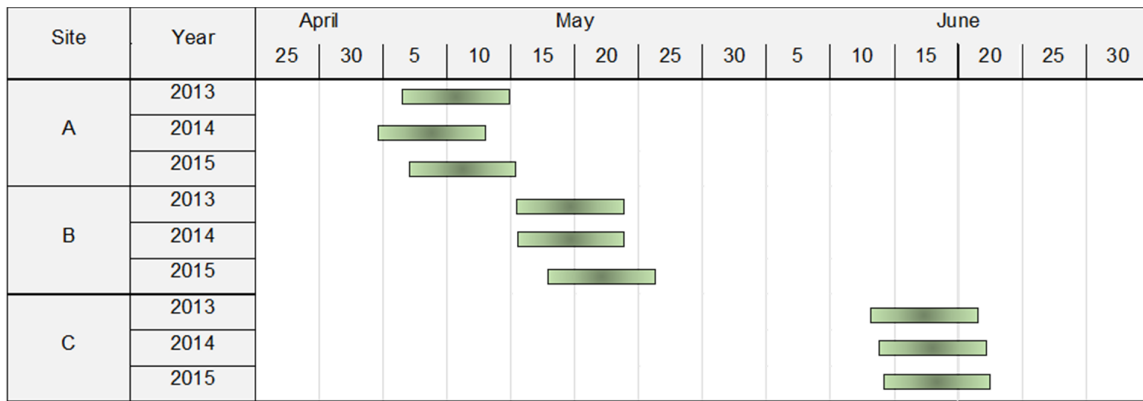

Figure S1. Flowering periods in the three years (2013, 2014 and 2015) in the three olive groves sites (site A, site B and site C).

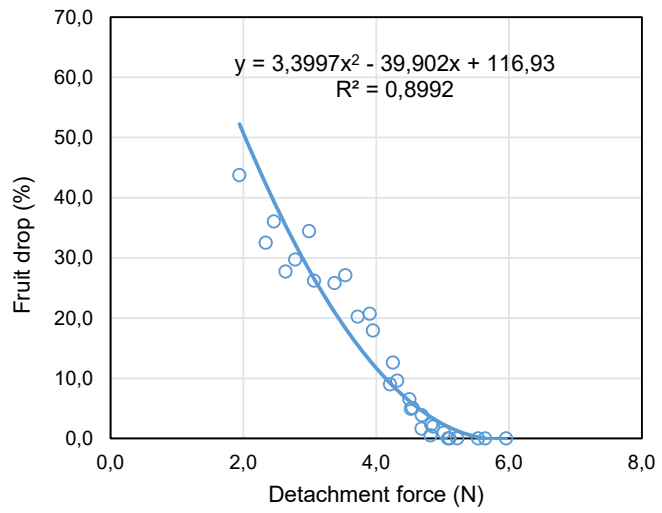

Figure S2. Relationship between detachment force and fruit drop.

Table S1. Multivariate analysis of qualitative characteristics of oil olive extracted from drupes produced from olive trees grown in three different sites.

| Variables       | Total acidity | Total waxes | Total polyphenols | Total tocopherols | SFA | C18:1/C18:2 |
|-----------------|---------------|-------------|-------------------|-------------------|-----|-------------|
| Altitude        |               |             | **                | *                 | *   |             |
| Harvesting time | *             | *           | **                |                   |     | *           |

\*\* Significance for  $p < 0.01$ ; \* Significance for  $p < 0.05$
